# Supplementary material for: A host-directed macrocyclic peptide therapeutic for MDR gram negative bacterial infections
Source: PubMed Central journal article supplement (PMC8648872; doi:10.1038/s41598-021-02619-y), 2021-12-06
Supplement: 41598_2021_2619_MOESM1_ESM.pdf [file 41598_2021_2619_MOESM1_ESM.pdf]

## A Host-Directed Macrocyyclic Peptide Therapeutic for MDR Gram Negative Bacterial Infections

Justin B. Schaal\*, Yoshihiro Eriguchi, Dat Q. Tran, Patti A. Tran, Chase Hawes, Anthony Cabebe, Kaitlyn Pike, Katie Trinh, André J. Ouellette, Michael E. Selsted

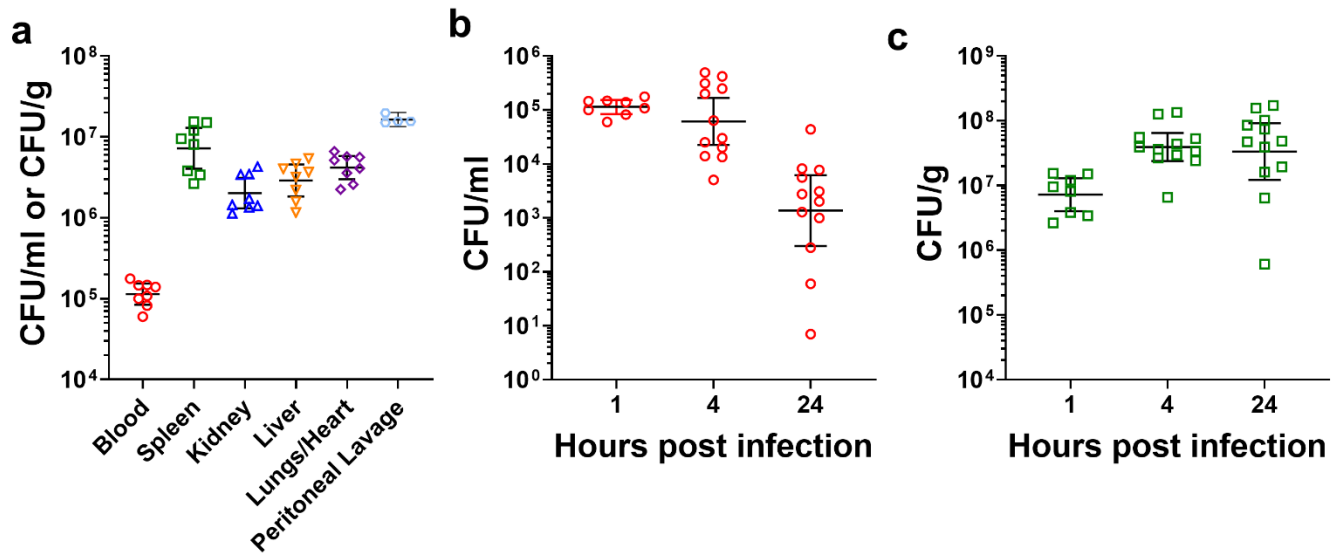

**Supplemental Figure 1: Rapid dissemination of *Kp-1705* following intraperitoneal infection. (a-c)** Male and female BALB/c mice were challenged i.p. with *Kp-1705* ( $3 - 5 \times 10^8$  CFU). (a) One h p.i. animals were euthanized and bacterial burden determined for blood, spleen, kidney, liver, lungs/heart, and peritoneal lavage (n=8). Bacterial burden in blood (b) and spleen homogenate (c) were determined at 1, 4 and 24 h p.i. Data are means  $\pm$  95% CI.

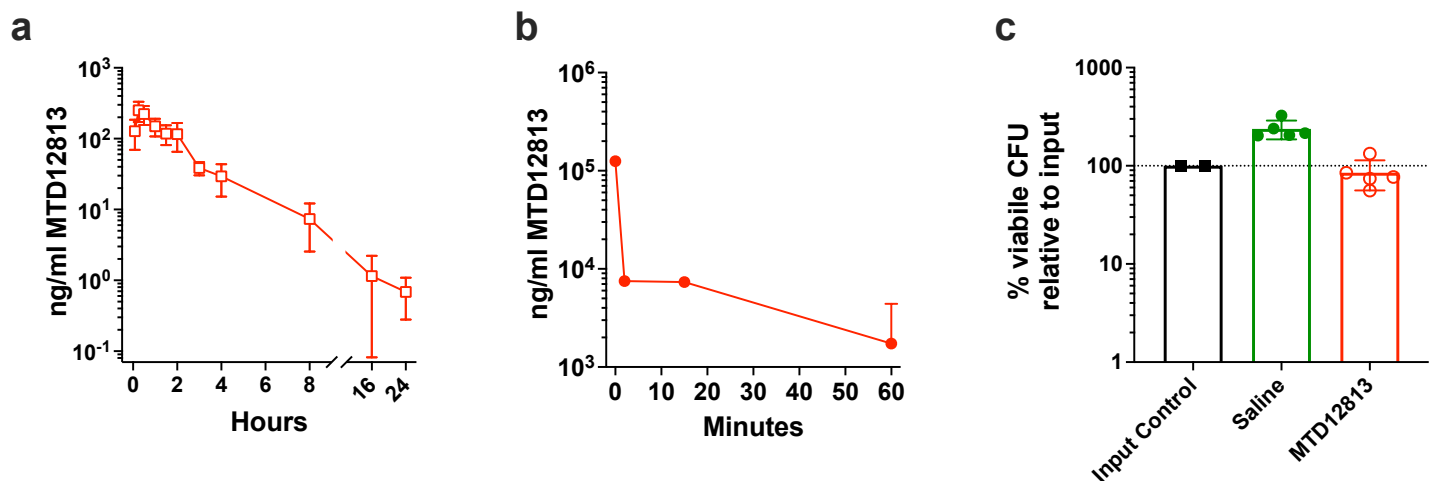

**Supplemental Figure 2. MTD12813 pharmacokinetics and peritoneal fluid antimicrobial**

**activities.** (a-b) Naïve BALB/c mice (2M/2F per time point) received 1.25 mg/kg MTD12813 by a single i.p. injection. (a) Blood plasma and (b) peritoneal fluid peptide levels were quantified by LC-MS/MS. (c) Peritoneal fluid was collected from uninfected mice (2M/2F) injected i.p. with saline or 1.25 mg/kg MTD12813. Fluids were inoculated *in vitro* with  $2 \times 10^7$  CFU/ml of *Kp*-1705, incubated for 1 h at 37° C, and viability determined by counting CFU on TSA plates.

| Cytokine           | Hour<br>p.i. | Sham (n=5)     |    | Saline (n=11-12)    |    | MTD12813 (n=11-12)  |    | Delta     | % Change | P-value                       |
|--------------------|--------------|----------------|----|---------------------|----|---------------------|----|-----------|----------|-------------------------------|
|                    |              | Mean           | SD | Mean                | SD | Mean                | SD |           |          |                               |
| IL-6               | 2            |                |    | 266274.4 ± 149491.2 |    | 216618.0 ± 97937.0  |    | -49656.5  | -18.6    | 0.472                         |
|                    | 4            | 24.5 ± 20.0    |    | 239682.6 ± 150080.3 |    | 128253.4 ± 109127.5 |    | -111429.2 | -46.5    | <b>0.0328</b>                 |
|                    | 24           |                |    | 224517.4 ± 278673.0 |    | 687.0 ± 481.4       |    | -223830.4 | -99.7    | <b>4.38 × 10<sup>-6</sup></b> |
| CXCL1<br>(KC)      | 2            |                |    | 364564.4 ± 167803.7 |    | 258876.9 ± 142590.2 |    | -105687.5 | -29.0    | 0.1260                        |
|                    | 4            | 169.7 ± 113.2  |    | 380278.4 ± 305680.2 |    | 168047.7 ± 111004.5 |    | -212230.7 | -55.8    | <b>9.59 × 10<sup>-3</sup></b> |
|                    | 24           |                |    | 118116.7 ± 143173.3 |    | 1365.9 ± 854.1      |    | -116750.8 | -98.8    | <b>1.25 × 10<sup>-5</sup></b> |
| CXCL10<br>(IP-10)  | 2            |                |    | 29029.4 ± 6754.2    |    | 37616.2 ± 12095.1   |    | 8586.9    | 29.6     | 0.126                         |
|                    | 4            | 200.1 ± 58.0   |    | 110999.9 ± 40362.5  |    | 68204.6 ± 15429.1   |    | -42795.3  | -38.6    | <b>2.45 × 10<sup>-3</sup></b> |
|                    | 24           |                |    | 9666.3 ± 9142.1     |    | 1667.5 ± 229.7      |    | -7998.8   | -82.7    | <b>3.39 × 10<sup>-4</sup></b> |
| CCL2<br>(MCP-1)    | 2            |                |    | 62216.0 ± 7150.9    |    | 59107.8 ± 9072.5    |    | -3108.2   | -5.0     | 0.462                         |
|                    | 4            | 48.8 ± 50.7    |    | 60693.2 ± 11269.2   |    | 33486.3 ± 10505.8   |    | -27206.9  | -44.8    | <b>2.68 × 10<sup>-5</sup></b> |
|                    | 24           |                |    | 53241.7 ± 94318.5   |    | 664.5 ± 313.4       |    | -52577.2  | -98.8    | <b>8.57 × 10<sup>-5</sup></b> |
| CCL4<br>(MIP-1β)   | 2            |                |    | 64892.4 ± 9360.0    |    | 46231.0 ± 13225.6   |    | -18661.3  | -28.8    | <b>9.30 × 10<sup>-3</sup></b> |
|                    | 4            | 16.3 ± 9.3     |    | 35052.8 ± 7096.8    |    | 24260.1 ± 5045.1    |    | -10792.7  | -30.8    | <b>7.45 × 10<sup>-4</sup></b> |
|                    | 24           |                |    | 3674.5 ± 4025.7     |    | 409.9 ± 163.9       |    | -3264.6   | -88.8    | <b>1.66 × 10<sup>-4</sup></b> |
| CXCL2<br>(MIP-2)   | 2            |                |    | 145483.3 ± 23309.5  |    | 105959.4 ± 38123.4  |    | -39523.9  | -27.2    | <b>0.0379</b>                 |
|                    | 4            | 208.3 ± 125.0  |    | 51686.3 ± 23415.4   |    | 27003.7 ± 18839.5   |    | -24682.6  | -47.8    | <b>0.0117</b>                 |
|                    | 24           |                |    | 53979.5 ± 70550.0   |    | 228.1 ± 86.3        |    | -53751.4  | -99.6    | <b>3.71 × 10<sup>-5</sup></b> |
| CCL11<br>(Eotaxin) | 4            | 917.8 ± 452.8  |    | 3962.8 ± 589.1      |    | 3978.9 ± 435.1      |    | 16.1      | 0.4      | 0.865                         |
|                    | 24           |                |    | 5046.0 ± 2719.7     |    | 1258.5 ± 296.0      |    | -3787.5   | -75.1    | <b>3.24 × 10<sup>-6</sup></b> |
| IFNγ               | 4            | 1.1 ± 0.0      |    | 77.7 ± 48.5         |    | 57.5 ± 47.9         |    | -20.2     | -26.0    | 0.246                         |
|                    | 24           |                |    | 109.6 ± 144.9       |    | 1.1 ± 0.0           |    | -108.5    | -99.0    | <b>9.45 × 10<sup>-4</sup></b> |
| IL-1α              | 4            | 67.5 ± 112.1   |    | 277.9 ± 80.6        |    | 282.8 ± 103.6       |    | 4.9       | 1.8      | 0.973                         |
|                    | 24           |                |    | 1030.9 ± 1915.3     |    | 93.7 ± 57.8         |    | -937.2    | -90.9    | <b>4.89 × 10<sup>-3</sup></b> |
| IL-1β              | 4            | 5.4 ± 0.0      |    | 123.7 ± 62.2        |    | 104.9 ± 60.0        |    | -18.8     | -15.2    | 0.548                         |
|                    | 24           |                |    | 177.9 ± 267.3       |    | 5.2 ± 1.3           |    | -172.6    | -97.1    | <b>0.0288</b>                 |
| IL-5               | 4            | 1.0 ± 0.0      |    | 154.6 ± 131.5       |    | 189.3 ± 138.1       |    | 34.6      | 22.4     | 0.294                         |
|                    | 24           |                |    | 485.2 ± 629.9       |    | 16.2 ± 21.2         |    | -469.0    | -96.7    | <b>7.07 × 10<sup>-4</sup></b> |
| IL-9               | 4            | 126.5 ± 197.2  |    | 236.4 ± 139.2       |    | 491.8 ± 298.9       |    | 255.4     | 108.0    | <b>0.032</b>                  |
|                    | 24           |                |    | 695.5 ± 709.8       |    | 49.9 ± 54.1         |    | -645.5    | -92.8    | <b>7.30 × 10<sup>-3</sup></b> |
| IL-10              | 4            | 2.0 ± 0.0      |    | 1472.0 ± 417.1      |    | 1768.1 ± 505.6      |    | 296.1     | 20.1     | 0.196                         |
|                    | 24           |                |    | 4275.1 ± 3340.0     |    | 296.6 ± 216.3       |    | -3978.5   | -93.1    | <b>4.57 × 10<sup>-5</sup></b> |
| IL-12 (p40)        | 4            | 3.9 ± 0.0      |    | 166.0 ± 79.8        |    | 137.7 ± 34.3        |    | -28.3     | -17.0    | 0.504                         |
|                    | 24           |                |    | 25.6 ± 23.7         |    | 3.9 ± 0.0           |    | -21.7     | -84.7    | <b>3.78 × 10<sup>-3</sup></b> |
| IL-12 (p70)        | 4            | 4.8 ± 0.0      |    | 180.8 ± 42.1        |    | 200.0 ± 67.6        |    | 19.1      | 10.6     | 0.650                         |
|                    | 24           |                |    | 129.4 ± 110.4       |    | 4.8 ± 0.0           |    | -124.6    | -96.3    | <b>7.50 × 10<sup>-4</sup></b> |
| LIF                | 4            | 1.0 ± 0.0      |    | 37.1 ± 15.8         |    | 28.6 ± 22.8         |    | -8.5      | -22.9    | 0.108                         |
|                    | 24           |                |    | 514.1 ± 677.1       |    | 1.0 ± 0.0           |    | -513.1    | -99.8    | <b>1.59 × 10<sup>-6</sup></b> |
| IL-13              | 4            | 103.7 ± 23.8   |    | 276.2 ± 54.4        |    | 311.0 ± 71.2        |    | 34.8      | 12.6     | 0.302                         |
|                    | 24           |                |    | 211.9 ± 118.2       |    | 25.7 ± 16.0         |    | -186.2    | -87.9    | <b>7.21 × 10<sup>-7</sup></b> |
| CXCL5<br>(LIX)     | 4            | 1581.1 ± 715.6 |    | 2830.2 ± 1294.5     |    | 3115.6 ± 2014.5     |    | 285.4     | 10.1     | 0.981                         |
|                    | 24           |                |    | 4240.1 ± 2475.4     |    | 678.2 ± 303.6       |    | -3561.9   | -84.0    | <b>2.62 × 10<sup>-6</sup></b> |
| IL-15              | 4            | 124.9 ± 92.8   |    | 382.9 ± 161.3       |    | 642.5 ± 276.2       |    | 259.7     | 67.8     | <b>9.14 × 10<sup>-3</sup></b> |
|                    | 24           |                |    | 662.1 ± 335.2       |    | 391.3 ± 355.3       |    | -270.9    | -40.9    | 0.0519                        |
| IL-17              | 4            | 2.2 ± 3.4      |    | 46.4 ± 21.5         |    | 66.4 ± 27.4         |    | 19.9      | 42.9     | 0.111                         |
|                    | 24           |                |    | 1613.4 ± 2215.2     |    | 0.8 ± 0.7           |    | -1612.6   | -100.0   | <b>1.06 × 10<sup>-7</sup></b> |
| CCL3<br>(MIP-1α)   | 4            | 46.1 ± 44.1    |    | 1446.7 ± 625.9      |    | 866.2 ± 318.7       |    | -580.5    | -40.1    | <b>5.72 × 10<sup>-3</sup></b> |
|                    | 24           |                |    | 595.6 ± 381.8       |    | 161.8 ± 58.9        |    | -433.8    | -72.8    | <b>6.84 × 10<sup>-5</sup></b> |
| M-CSF              | 4            | 3.5 ± 0.0      |    | 122.8 ± 60.3        |    | 118.1 ± 50.1        |    | -4.8      | -3.9     | 0.947                         |
|                    | 24           |                |    | 175.4 ± 219.1       |    | 7.8 ± 6.4           |    | -167.6    | -95.5    | <b>8.88 × 10<sup>-3</sup></b> |
| GM-CSF             | 4            | 10.9 ± 0.0     |    | 84.5 ± 16.2         |    | 75.2 ± 24.8         |    | -9.2      | -10.9    | 0.282                         |
|                    | 24           |                |    | 102.9 ± 109.8       |    | 10.9 ± 0.0          |    | -92.0     | -89.4    | <b>1.15 × 10<sup>-3</sup></b> |
| CXCL9<br>(MIG)     | 4            | 34.8 ± 29.1    |    | 4108.2 ± 476.4      |    | 3811.4 ± 778.2      |    | -296.8    | -7.2     | 0.265                         |
|                    | 24           |                |    | 4839.0 ± 3354.1     |    | 873.1 ± 208.2       |    | -3965.9   | -82.0    | <b>1.61 × 10<sup>-5</sup></b> |
| CCL5<br>(RANTES)   | 4            | 3.9 ± 2.4      |    | 1205.2 ± 314.6      |    | 722.8 ± 390.1       |    | -482.4    | -40.0    | <b>0.0166</b>                 |
|                    | 24           |                |    | 1003.9 ± 680.1      |    | 118.3 ± 42.0        |    | -885.6    | -88.2    | <b>6.57 × 10<sup>-6</sup></b> |
| TNF                | 4            | 2.3 ± 0.0      |    | 241.2 ± 56.7        |    | 166.6 ± 30.3        |    | -74.6     | -30.9    | <b>9.33 × 10<sup>-4</sup></b> |
|                    | 24           |                |    | 214.3 ± 190.9       |    | 21.9 ± 7.0          |    | -192.4    | -89.8    | <b>3.53 × 10<sup>-5</sup></b> |

**Supplemental Table 1.** Mice were challenged i.p. with *Kp*-1705 and treated 1 h later with MTD12813 (1.25 mg/kg i.p.) or saline. The sham cohort received bacteria-free suspension buffer at t=0 followed by saline 1 h later. Mice were euthanized 2, 4, or 24 h p.i., and plasma samples were subjected to multiplex cytokine analysis. P values calculated using ANOVA with Uncorrected Fisher's LSD comparing saline and MTD12813 treated mice at respective time points.

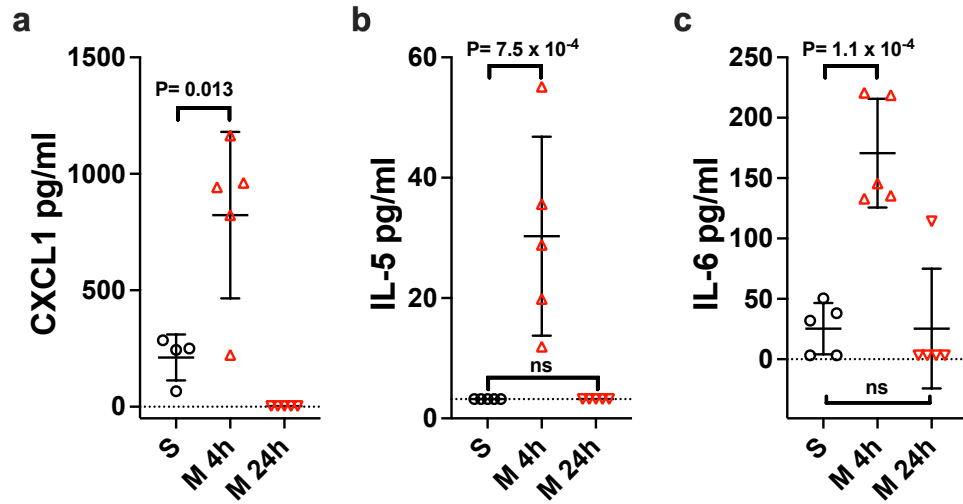

**Supplemental Fig. 3. Transient stimulation of cytokines by MTD12813.** Sham infected mice were injected i.p with PBS and treated i.p. 1 h later with 1.25 mg/kg MTD12813 (M) or saline (S). Four or 24 h post sham infection, animals were euthanized and plasma samples quantified by multiplex cytokine analysis. P values calculated using ANOVA with Uncorrected Fisher's LSD comparing saline and MTD12813 treated mice.

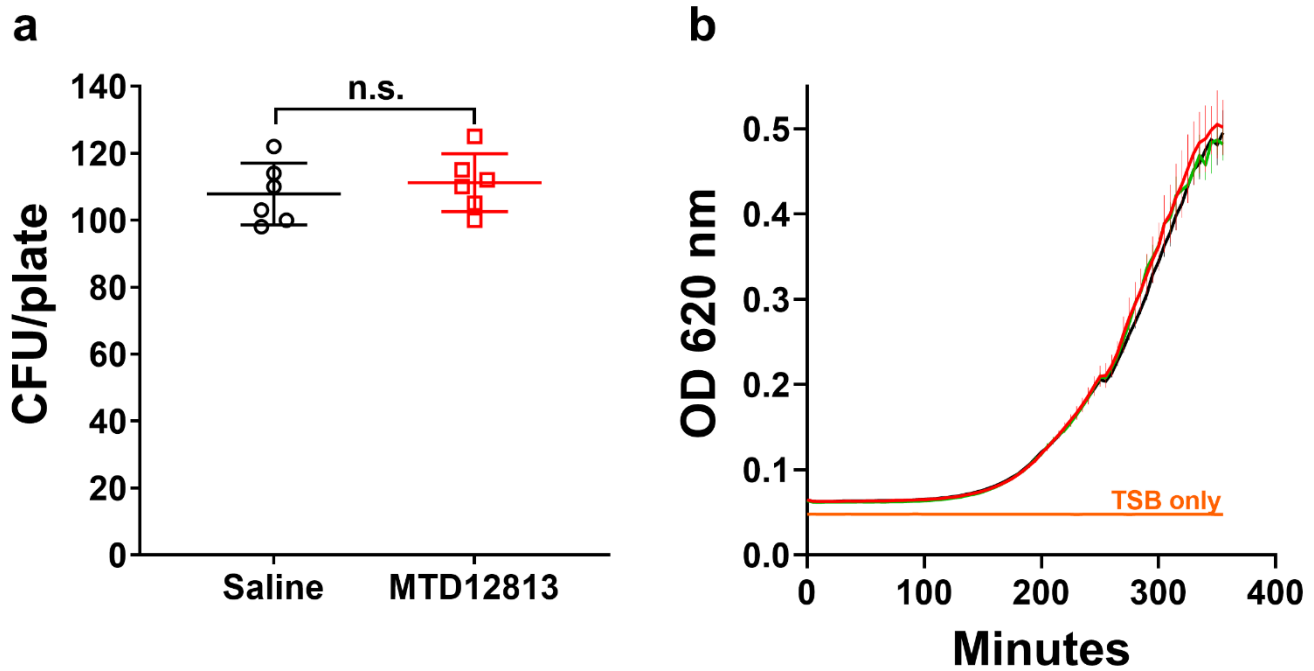

**Supplemental Fig 4. Sub-MIC concentrations of MTD12813 does not affect bacterial viability or replication fitness of *Kp-1705*.** *Kp-1705* ( $1 \times 10^9$  CFU/ml) was incubated for 1 h with 1.25  $\mu$ g/ml MTD12813 or saline. (a) Bacterial viability was quantified as CFU on TSA plates. P value determined by Student's t-test. (b) *Kp-1705* replication fitness was determined by incubating a 40-fold dilution of the incubation mixtures from panel (a) in TSB and measuring bacterial growth (black-saline; red-MTD12813) at  $A_{620}$ . The green growth curve is of bacteria incubated with TSB in the presence of 1.25  $\mu$ g/ml MTD12813 and "TSB only" is absorbance of sterile medium. Samples were analyzed in triplicate with standard deviation shown.
